# Supplementary material for: Differential response of bovine mammary epithelial cells to Staphylococcus aureus or Escherichia coli agonists of the innate immune system
Source: PubMed Central journal article supplement (PMC3686618; doi:10.1186/1297-9716-44-40), 2013-06-11

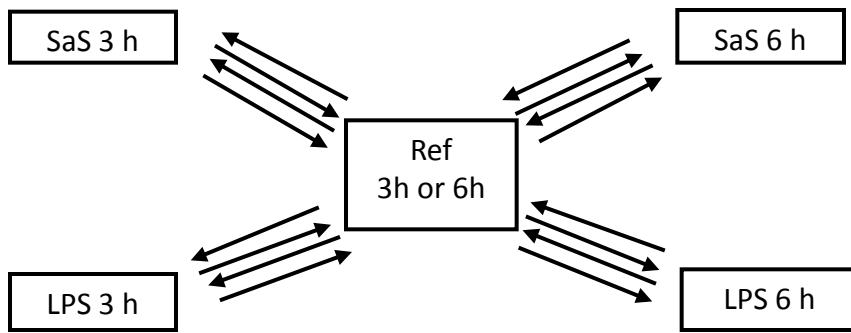

Supplement: 1297-9716-44-40-S2.pdf [file 1297-9716-44-40-S2.pdf]
